# Supplementary material for: Soy Product Consumption and the Risk of Cancer: A Systematic Review and Meta-Analysis of Observational Studies
Source: MDPI journal article supplement (doi:10.3390/nu16070986), 2024-03-28
Supplement: s1 [file s1]

**Supplementary Table S2.** Covariates and Nos score of included studies for this systematic review and meta-analysis.

| First author, Year | Adjustments                                                                                                                                                                                                                                                                                                       | Nos score |
|--------------------|-------------------------------------------------------------------------------------------------------------------------------------------------------------------------------------------------------------------------------------------------------------------------------------------------------------------|-----------|
| Chyou,1995         | Age, Alcohol intake,Smoking                                                                                                                                                                                                                                                                                       | 7         |
| Galanis,1998       | Age, Alcohol intake, Birth place, Education, Sex, Smoking                                                                                                                                                                                                                                                         | 9         |
| Nomura,2004        | Age, Alcohol intake, Arm muscle area, BMI, Smoking, Total calories                                                                                                                                                                                                                                                | 8         |
| Oba,2007           | Age, Alcohol intake, BMI, Coffee intake, Height, Physical exercise, Smoking, and Use of hormone replacement therapy                                                                                                                                                                                               | 9         |
| Akhter,2008        | Age, Alcohol intake, BMI, Dairy products, History of diabetes mellitus, Intake of vitamin D, meat, vegetable, fruit, and fish, Menopausal status and Current use of femal hormones, Physical activity, Public health center area, Smoking                                                                         | 8         |
| Seow,2009          | Age, BMI, Education, Smoking, Year of interview, Dialect group, Total vegetable intake, Total fruit/juice intake, h-cryptoxanthin, Total isothiocyanates                                                                                                                                                          | 8         |
| Wang,2009          | Age, Alcohol intake, BMI, Family history of colorectal cancer, ovary cancer, or breast cancer, Hormone replacement therapy use, Intake of fruit and vegetables, fiber, folate, saturated fat Multivitamin use, Physical activity, Postmenopausal status, Race, Randomized treatment, Total energy intake, Smoking | 5         |
| Yang,2009          | Age, BMI, Education, Family history of colorectal cancer, Household income, Physical activity, Menopausal status, Total calorie intake and average intakes of fruit, vegetables, red meat, nonsoy calcium, nonsoy fiber, and nonsoy folic acid and was stratified by birth year                                   | 8         |
| Hara,2012          | Age and Public center area, BMI, Smoking, Ethanol intake, Family history of gastric cancer, Fruit intake, fish intake, Salt intake, Total energy intake, Vegetable intake                                                                                                                                         | 8         |
| Ollberding, 2012   | Age, Age at cohort entry, Age at menarche, Age at menopause, BMI, Current unopposed estrogen use, Diabetes, Duration and type of hormone therapy use, Duration of oral contraceptive, Parity, Race, Smoking, Total calories                                                                                       | 6         |
| Ko,2013            | Age at menarche, Alcohol intake, Calorie intake, Education, Parity, Physical exercise, Smoking,                                                                                                                                                                                                                   | 4         |
| Wada,2015          | Age, Alcohol intake, BMI, Education, Menopausal status, Physical activity, Smoking, Salt intake                                                                                                                                                                                                                   | 9         |
| Paul,2019          | Age, Dialect group, Duration of oral contraceptive use, Education, History of Pap-based test, Menopausal status, and Daily total calorie intake, Parity, Smoking, Year of interview                                                                                                                               | 8         |
| Abe,2020           | Age, Area, Smoking, Alcohol intake, Age at menarche, Age at first birth, Number of deliveries, Menopausal age, Hormone use, and Breast feeding, BMI, Height, Energy intake, History of diabetes, Family history, Physical activity, Received mammography                                                          | 6         |

---

|                       |                                                                                                                                                                                                                                                         |   |
|-----------------------|---------------------------------------------------------------------------------------------------------------------------------------------------------------------------------------------------------------------------------------------------------|---|
| Shirabe,2021          | Age, Area,Smoking, Alcohol intake, Age at menarche, Age at first birth, Number of deliveries, Menopausal age, Hormone use, and Breast feeding, BMI, Height, Energy intake, History of diabetes, Family history, Physical activity, Received mammography | 6 |
| Nozue, 2021           | Age, Alcohol intake, BMI, Intakes of total energy, vegetables, fruit, fish, green tea and coffee, Menopausal status, Metabolic equivalent task hours, Public health center area, Smoking                                                                | 7 |
| Shin, 2023            | Age, Alcohol intake, BMI, Education, Regular exercise, Smoking, Sodium intake, The presence of a family history of gastric cancer, Total energy intake, vegetable intake                                                                                | 7 |
| Lee,1995              | Age, Area, Education, Economic status, Other dietary factors,Sex                                                                                                                                                                                        | 6 |
| Horn-Ross, 2001       | Age, Age at menarche, BMI, Education, Daily caloric intake, Ethnicity, Family history of breast cancer, History of benign breast cancer, Parity, A composite variable including menopausal status,Hormone replacement therapy use                       | 8 |
| Seow,2002             | Age, Fruit intake, First-degree relative with history of cancer, Place of birth, Smoking                                                                                                                                                                | 8 |
| Wu,2002               | Age, Alcohol intake, Age at menarche, Asian-ethnicity, BMI, Birth place, Education, Family history of breast cancer, Intake of dark leafy greens, Menopausal status and use of menopausal, Pregnancy, Smoking, Physical activity                        | 7 |
| Hirose,2003           | Age, Age at menarche, Family history, First year, Parity and Age at first full term pregnancy                                                                                                                                                           | 7 |
| Lee,2003              | Age, Alcohol intake, Education, Family history of gastric cancer, H.pylori infection, Sex, Smoking                                                                                                                                                      | 8 |
| Jian,2004             | Age, Area, Caloric intake, BMI, Education, Fresh vegetables and fruits consumption, tea drinking, Family income, Marital status, MET, Prostate cancer in first-degree relatives                                                                         | 7 |
| Hung,2004             | Age, Alcohol intake, Education, Ethnicity, Source of hospital, Smoking and areca nut chewing                                                                                                                                                            | 7 |
| Machida-montani, 2004 | Age, Family history of gastric cancer, H.pylori infection, JA membership, Smoking, Salt intake, Total energy intake, Total vegetable intake, Total fruit intake                                                                                         | 8 |
| Sonoda,2004           | Age, Energy intake, Smoking                                                                                                                                                                                                                             | 6 |
| Xu,2004               | Age, BMI, Education, Energy intake, Family history of any cancer, Number of pregnancies, Menopausal status, Oral contraceptive use, Physical activity, Total meat intake, Years of menstruation                                                         | 7 |
| Nan,2005              | Age, Sex                                                                                                                                                                                                                                                | 5 |
| Hirose,2005           | Age, Alcohol intake, Age at menarche, Age at first full-term pregnancy, Age at menopause for postmenopausal women, BMI, Energy, Family history, Motives for consultation, Parity, Physical exercise, Smoking                                            | 7 |

---

|                 |                                                                                                                                                                                                                                                                                      |   |
|-----------------|--------------------------------------------------------------------------------------------------------------------------------------------------------------------------------------------------------------------------------------------------------------------------------------|---|
| Sharp,2005      | Attained age, City, HBV and HCV, Liver irradiation level, Year of death, Sex                                                                                                                                                                                                         | 5 |
| Shannon,2005    | Age, Breast-feeding, Total energy intake                                                                                                                                                                                                                                             | 5 |
| Heald,2007      | Age, Carstairs Deprivation Index, Energy intake, Family history of prostate cancer, Smoking, Total energy intake                                                                                                                                                                     | 7 |
| Kim,2008        | Age, Breast feeding, Carbohydrate intake, Dietary factors, Drinking, Number of children, Multivitamin use                                                                                                                                                                            | 7 |
| Li,2008         | Age, Alcohol intake, BMI, Education, Food frequency, Smoking                                                                                                                                                                                                                         | 7 |
| Matsuo,2008     | Age, Energy intake, Sex, Smoking                                                                                                                                                                                                                                                     | 6 |
| Bandera,2009    | Age, Age at menarche, BMI, Education, Menopausal status and Age at menopause for postmenopausal women, OC use, Parity, Race, Total calories                                                                                                                                          | 7 |
| Liu,2009        | Age, Sex                                                                                                                                                                                                                                                                             | 7 |
| Hosono,2010     | Age, Alcohol intake, Any vitamin supplement usage and energy, Gravidity, OC usage, Smoking                                                                                                                                                                                           | 7 |
| Budhathoki 2011 | Age, Area, Alcohol intake, BMI, Sex, Smoking, Intake of calcium and n-3 polyunsaturated fatty acids, Parental colorectal cancer, Type of job, Physical activity                                                                                                                      | 8 |
| Chihara,2012    | Age, Alcohol intake, BMI at 20 years of age, Smoking, Total energy intake                                                                                                                                                                                                            | 6 |
| Wang,2012       | Age, Dietary risk factors, Education, Family history of cancer in first degree relatives, Sex                                                                                                                                                                                        | 7 |
| Wang,2012       | Age, Alcohol intake, Education, Family history, Pickled food, Smoking, Total vegetable intake, Total fruit intake, Total energy intake, meat, and H pylori                                                                                                                           | 6 |
| Zaineddin, 2012 | Alcohol intake, Age at menarche, BMI, Education, Breast feeding history, Energy intake, Fiber intake, Family history of breast cancer, History of benign breast disease, Number of pregnancies, Menopausal status, Total number of mammograms, Smoking, Phytoestrogen supplement use | 5 |
| Lee,2014        | Age, Alcohol intake, BMI, Education, Family history of ovarian or breast cancer, Menopausal status, Oral contraceptive use, Physical activity, Parity, Hormone replacement therapy, Total energy intake, Smoking                                                                     | 7 |
| Tang,2015       | Age, Alcohol intake, BMI, Education, Family history of cancer in first-degree relatives, Total energy intake, Sex, Smoking                                                                                                                                                           | 7 |
| Shin,2015       | Age, Alcohol intake, Education, Physical exercise                                                                                                                                                                                                                                    | 5 |
| Yang,2017       | Age, Alcohol intake, Education, H pylori infection, Physical exercise, Smoking                                                                                                                                                                                                       | 7 |
| Barrett,2019    | Age, Area, Adolescent daily energy intake, Energy-adjusted intake of other foods and Childhood frequency of intake of total preserved foods, Current housing type, Current occupation, Education, First-degree family history of NPC, Smoking, Sex                                   | 7 |
| Cao,2022        | Age at diagnosis for cases or enrollment for controls, Area, Age at menarche, number of full-term birth, Age at first full-term delivery, BMI,                                                                                                                                       | 5 |

---

|           |                                                                                                                                                                                                |   |
|-----------|------------------------------------------------------------------------------------------------------------------------------------------------------------------------------------------------|---|
|           | Breast feeding, Education, Family history of breast cancer, Hormone replacement therapy, History of benign breast disease, Menopausal age, Oral contraceptives use, Physical activity, Smoking |   |
| Teng,2023 | Age, Alcohol intake, Education, Occupation, Sex, Smoking                                                                                                                                       | 8 |
| Kwak,2023 | Age, Alcohol intake, BMI, Education, Family history of gastric cancer, Hospital, Other food intake, Total energy intake, Sex, Smoking                                                          | 6 |

---

<sup>1</sup>Nos, Newcastle-Ottwa Scale
