# Supplementary material for: Soy Product Consumption and the Risk of Cancer: A Systematic Review and Meta-Analysis of Observational Studies
Source: MDPI journal article supplement (doi:10.3390/nu16070986), 2024-03-28
Supplement: s1 [file s1]

**Supplementary Table S3.** Quality assessment of included studies for this systematic review and meta-analysis.

| Study           | Selection of the study groups<br>0-4 | Adjustment for Known confounding factors<br>0-2 | Ascertainment of the outcome of interest<br>0-3 | Total score |
|-----------------|--------------------------------------|-------------------------------------------------|-------------------------------------------------|-------------|
| Chyou           | 4                                    | 1                                               | 2                                               | 7           |
| Galanis         | 4                                    | 2                                               | 3                                               | 9           |
| Nomura          | 3                                    | 2                                               | 3                                               | 8           |
| Oba             | 4                                    | 2                                               | 3                                               | 9           |
| Akhter          | 3                                    | 2                                               | 3                                               | 8           |
| Seow            | 4                                    | 2                                               | 2                                               | 8           |
| Wang            | 1                                    | 2                                               | 2                                               | 5           |
| Yang            | 3                                    | 2                                               | 3                                               | 8           |
| Hara            | 3                                    | 2                                               | 3                                               | 8           |
| Ollberding      | 3                                    | 2                                               | 1                                               | 6           |
| Ko              | 2                                    | 2                                               | 0                                               | 4           |
| Wada            | 4                                    | 2                                               | 3                                               | 9           |
| Paul            | 4                                    | 2                                               | 2                                               | 8           |
| Abe             | 3                                    | 2                                               | 1                                               | 6           |
| Shirabe         | 3                                    | 2                                               | 1                                               | 6           |
| Nozue           | 3                                    | 2                                               | 2                                               | 7           |
| Shin            | 3                                    | 2                                               | 2                                               | 7           |
| Lee             | 2                                    | 2                                               | 2                                               | 6           |
| Horn-Ross       | 4                                    | 2                                               | 2                                               | 8           |
| Seow            | 3                                    | 2                                               | 3                                               | 8           |
| Wu              | 3                                    | 2                                               | 2                                               | 7           |
| Hirose          | 3                                    | 2                                               | 2                                               | 7           |
| Lee             | 4                                    | 2                                               | 2                                               | 8           |
| Jian            | 3                                    | 2                                               | 2                                               | 7           |
| Hung            | 3                                    | 2                                               | 2                                               | 7           |
| Machida-Montani | 4                                    | 2                                               | 2                                               | 8           |
| Sonoda          | 3                                    | 1                                               | 2                                               | 6           |
| Xu              | 3                                    | 2                                               | 2                                               | 7           |
| Nan             | 3                                    | 1                                               | 1                                               | 5           |
| Hirose          | 3                                    | 2                                               | 2                                               | 7           |
| Sharp           | 2                                    | 1                                               | 2                                               | 5           |
| Shannon         | 2                                    | 1                                               | 2                                               | 5           |
| Heald           | 3                                    | 2                                               | 2                                               | 7           |
| Li              | 3                                    | 2                                               | 2                                               | 7           |
| Kim             | 3                                    | 2                                               | 2                                               | 7           |
| Matsuo          | 3                                    | 1                                               | 2                                               | 6           |

|            |   |   |   |   |
|------------|---|---|---|---|
| Bandera    | 3 | 2 | 2 | 7 |
| Liu        | 4 | 1 | 2 | 7 |
| Hosono     | 3 | 2 | 2 | 7 |
| Budhathoki | 4 | 2 | 2 | 8 |
| Chihara    | 3 | 1 | 2 | 6 |
| Wang       | 3 | 2 | 2 | 7 |
| Wang       | 2 | 2 | 2 | 6 |
| Zaineddin  | 1 | 2 | 2 | 5 |
| Lee        | 3 | 2 | 2 | 7 |
| Tang       | 3 | 2 | 2 | 7 |
| Shin       | 2 | 1 | 2 | 5 |
| Yang       | 3 | 2 | 2 | 7 |
| Barrett    | 3 | 2 | 2 | 7 |
| Cao        | 1 | 2 | 2 | 5 |
| Teng       | 4 | 2 | 2 | 8 |
| Kwak       | 2 | 2 | 2 | 6 |
