# Supplementary material for: Soy Product Consumption and the Risk of Cancer: A Systematic Review and Meta-Analysis of Observational Studies
Source: MDPI journal article supplement (doi:10.3390/nu16070986), 2024-03-28
Supplement: s1 [file s1]

**Supplementary Table S4.** Exposure categories and ORs of included studies for this systematic review and meta-analysis.

| First author,<br>Year | Exposure category<br>(lowest vs highest) | OR (95% CI)      |
|-----------------------|------------------------------------------|------------------|
| Chyou,1995            | Miso soup, Tofu                          |                  |
|                       | <1 times/week                            | 1 (ref)          |
|                       | 2-4 times/week                           | 1.41 (0.83-2.40) |
|                       | ≥5 times/week                            | 1.63 (0.51-5.21) |
| Galanis,1998          | Miso soup (Total)                        |                  |
|                       | None                                     | 1 (ref)          |
|                       | 1 or more times/week                     | 1.2 (0.8-1.8)    |
|                       | Miso soup (Male)                         |                  |
|                       | None                                     | 1 (ref)          |
|                       | 1 or more times/week                     | 1.2 (0.7-2.0)    |
|                       | Miso soup (Female)                       |                  |
|                       | None                                     | 1 (ref)          |
| Nomura,2004           | 1 or more times/week                     | 1.3 (0.7-2.4)    |
|                       | Tofu                                     |                  |
|                       | 0 g/week                                 | 1(ref)           |
|                       | 1-60 g/week                              | 1.17 (0.83-1.65) |
|                       | 61-120 g/week                            | 1.01 (0.74-1.39) |
|                       | 121-240 g/week                           | 1.18 (0.86-1.63) |
|                       | >240 g/week                              | 0.82 (0.54-1.23) |
| Oba,2007              | Soy product (Man)                        |                  |
|                       | 49.22 g/day                              | 1 (ref)          |
|                       | 85.52 g/day                              | 1.12 (0.69-1.84) |
|                       | 141.09 g/day                             | 1.24 (0.77-2.00) |
|                       | Soy product (Woman)                      |                  |
|                       | 46.29 g/day                              | 1 (ref)          |
|                       | 79.60 g/day                              | 0.84 (0.53-1.33) |
|                       | 128.03 g/day                             | 0.56 (0.34-0.92) |
| Akhter,2008           | Soy food                                 |                  |
|                       | 35.4 g/day (Man)                         | 1 (ref)          |
|                       | 65.7 g/day                               | 1.06 (0.83-1.36) |
|                       | 96.4 g/day                               | 0.94 (0.73-1.22) |
|                       | 169.9 g/day                              | 0.89 (0.69-1.17) |
|                       | 35.6 g/day (Woman)                       | 1 (ref)          |
|                       | 65.9 g/day                               | 0.87 (0.64-1.18) |
|                       | 94.9 g/day                               | 0.90 (0.66-1.23) |
|                       | 170.3 g/day                              | 1.04 (0.76-1.42) |
|                       | Miso Soup                                |                  |
|                       | 147.5 ml/day (Man)                       | 1 (ref)          |
|                       | 260 ml/day                               | 1.05 (0.81-1.35) |

|                     |                          |                  |
|---------------------|--------------------------|------------------|
|                     | 301.7 ml/day             | 0.98 (0.76-1.27) |
|                     | 313.7 ml/day             | 0.88 (0.64-1.10) |
|                     | 125.6 ml/day (Woman)     | 1 (ref)          |
|                     | 212.8 ml/day             | 0.87 (0.64-1.18) |
|                     | 246.9 ml/day             | 0.90 (0.66-1.23) |
|                     | 261.3 ml/day             | 1.04 (0.76-1.42) |
| Seow,2009           | Soybean drink            |                  |
|                     | 30.7 g/day               | 1 (ref)          |
|                     | 66.1 g/day               | 0.93 (0.69-1.24) |
|                     | 108.8 g/day              | 0.77 (0.55-1.06) |
|                     | 197.7 g/day              | 0.75 (0.53-1.05) |
| Wang,2009           | Tofu                     |                  |
|                     | <1 serving/month         | 1 (ref)          |
|                     | 1-3 serving/month        | 0.98 (0.83-1.16) |
|                     | 1 serving/week           | 0.89 (0.65-1.21) |
|                     | ≥2 servings/week         | 0.91 (0.61-1.35) |
| Yang,2009           | Soy foods                |                  |
|                     | ≤12.8 g/day              | 1 (ref)          |
|                     | 12.9-21 g/day            | 0.86 (0.66-1.13) |
|                     | >21 g/day                | 0.67 (0.49-0.90) |
| Hara,2012           | Miso soup                |                  |
|                     | 63 ml/day(Man)           | 1 (ref)          |
|                     | 175 ml/day               | 1.02 (0.83-1.26) |
|                     | 294 ml/day               | 1.08 (0.87-1.33) |
|                     | 449 ml/day               | 1.17 (0.94-1.47) |
|                     | 47 ml/day(Woman)         | 1 (ref)          |
|                     | 140 ml/day               | 0.85 (0.63-1.14) |
|                     | 224 ml/day               | 0.81 (0.59-1.11) |
|                     | 384 ml/day               | 0.71 (0.50,1.01) |
|                     | Soy food                 |                  |
|                     | 33.4 g/day (Man)         | 1 (ref)          |
|                     | 59.3 g/day               | 1.06 (0.87-1.29) |
|                     | 86.1 g/day               | 1.03 (0.84-1.26) |
|                     | 140.6 g/day              | 1.02 (0.82-1.25) |
|                     | 33 g/day (Woman)         | 1 (ref)          |
|                     | 58.7 g/day               | 0.99 (0.73-1.35) |
|                     | 85.2 g/day               | 1.12 (0.83-1.53) |
|                     | 141 g/d                  | 0.99 (0.71-1.38) |
| Ollberding,<br>2012 | Tofu                     |                  |
|                     | 0-0.21 g/1000kcal/day    | 1 (ref)          |
|                     | 0.22-0.85 g/1000kcal/day | 0.92 (0.71-1.21) |
|                     | 0.86-2.71 g/1000kcal/day | 0.90 (0.68-1.19) |
|                     | 2.72-7.55 g/1000kcal/day | 0.98 (0.70-1.36) |
|                     | ≥7.56 g/1000kcal/day     | 0.82 (0.56-1.21) |

|           |                                   |                   |
|-----------|-----------------------------------|-------------------|
| Ko,2013   | Soybean Products (BRCA carries)   |                   |
|           | 0-1 times/week                    | 1 (ref)           |
|           | 2 times/week                      | 1.22 (0.89, 1.67) |
|           | 3 times/week                      | 0.98 (0.72, 1.34) |
|           | 4-5 times/week                    | 0.69 (0.45, 1.06) |
|           | Soybean Products (BRCA nocarries) |                   |
|           | 0-1 times/week                    | 1 (ref)           |
|           | 2 times/week                      | 1.05 (0.89,1.23)  |
|           | 3 times/week                      | 0.96 (0.83,1.12)  |
|           | 4-5 times/week                    | 0.89 (0.74,1.09)  |
| Wada,2015 | Soy foods                         |                   |
|           | 38.4 g/day (Man)                  | 1 (ref)           |
|           | 74.1 g/day                        | 0.84 (0.64-1.09)  |
|           | 102.9 g/day                       | 0.85 (0.65-1.12)  |
|           | 176.3 g/day                       | 0.71 (0.53-0.96)  |
|           | 43.5 g/day (Woman)                | 1 (ref)           |
|           | 74.9 g/day                        | 1.08 (0.72-1.62)  |
|           | 102.4 g/day                       | 1.15 (0.76-1.72)  |
|           | 168.7 g/day                       | 0.58 (0.36-0.94)  |
|           | Fermented soy foods               |                   |
|           | 6.6 g/day (Man)                   | 1 (ref)           |
|           | 14.5 g/day                        | 1.13 (0.87-1.47)  |
|           | 20.5 g/day                        | 0.84 (0.63-1.12)  |
|           | 37.3 g/day                        | 1.02 (0.77-1.34)  |
|           | 7.5 g/day (Woman)                 | 1 (ref)           |
|           | 14.4 g/day                        | 0.95 (0.66-1.36)  |
|           | 20.9 g/day                        | 0.95 (0.66-1.38)  |
|           | 34.0 g/day                        | 0.79 (0.52-1.19)  |
|           | Nonfermented                      |                   |
|           | 27.7 g/day (Man)                  | 1 (ref)           |
|           | 57.3 g/day                        | 0.90 (0.69-1.16)  |
|           | 80.8 g/day                        | 0.88 (0.67-1.16)  |
|           | 147.8 g/day                       | 0.68 (0.50-0.91)  |
|           | 32.0 g/day (Woman)                | 1 (ref)           |
|           | 58.1 g/day                        | 0.89 (0.59-1.34)  |
|           | 80.6 g/day                        | 0.98 (0.66-1.47)  |
|           | 140.8 g/day                       | 0.63 (0.40-1.00)  |
| Paul,2019 | Soy food                          |                   |
|           | 31.29 g/1000kcal/day              | 1 (ref)           |
|           | 64.7 g/1000kcal/day               | 0.86 (0.66-1.13)  |
|           | 115.86 g/1000kcal/day             | 0.80 (0.61-1.05)  |
| Abe,2020  | Total soy food                    |                   |
|           | Quartile 1 (Man)                  | 1 (ref)           |
|           | Quartile 2                        | 1.12 (0.84-1.50)  |

---

|                      |                  |
|----------------------|------------------|
| Quartile 3           | 1.11 (0.82-1.50) |
| Quartile 4           | 1.06 (0.78-1.44) |
| Quartile 1 (Woman)   | 1 (ref)          |
| Quartile 2           | 0.70 (0.42-1.15) |
| Quartile 3           | 0.78 (0.48-1.28) |
| Quartile 4           | 1.13 (0.71-1.81) |
| Fermented soy food   |                  |
| Quartile 1 (Man)     | 1 (ref)          |
| Quartile 2           | 0.93 (0.69-1.24) |
| Quartile 3           | 0.96 (0.70-1.30) |
| Quartile 4           | 0.98 (0.71-1.35) |
| Quartile 1 (Woman)   | 1 (ref)          |
| Quartile 2           | 1.29 (0.79-2.11) |
| Quartile 3           | 1.03 (0.61-1.76) |
| Quartile 4           | 1.18 (0.68-2.03) |
| Miso                 |                  |
| Quartile 1 (Man)     | 1 (ref)          |
| Quartile 2           | 0.95 (0.64-1.11) |
| Quartile 3           | 0.76 (0.57-1.01) |
| Quartile 4           | 0.65 (0.48-0.89) |
| Quartile 1 (Woman)   | 1 (ref)          |
| Quartile 2           | 0.86 (0.53-1.40) |
| Quartile 3           | 0.90 (0.55-1.47) |
| Quartile 4           | 0.98 (0.59-1.62) |
| Natto                |                  |
| Quartile 1 (Man)     | 1 (ref)          |
| Quartile 2           | 1.14 (0.85-1.53) |
| Quartile 3           | 0.92 (0.66-1.29) |
| Quartile 4           | 1.33 (0.96-1.83) |
| Quartile 1 (Woman)   | 1 (ref)          |
| Quartile 2           | 0.54 (0.31-0.93) |
| Quartile 3           | 0.81 (0.49-1.36) |
| Quartile 4           | 0.93 (0.56-1.54) |
| Unfermented soy food |                  |
| Quartile 1 (Man)     | 1 (ref)          |
| Quartile 2           | 0.90 (0.67-1.21) |
| Quartile 3           | 0.96 (0.72-1.30) |
| Quartile 4           | 1.15 (0.86-1.54) |
| Quartile 1 (Woman)   | 1 (ref)          |
| Quartile 2           | 0.82 (0.51-1.33) |
| Quartile 3           | 0.64 (0.38-1.08) |
| Quartile 4           | 1.27 (0.81-2.00) |
| Tofu                 |                  |
| Quartile 1 (Man)     | 1 (ref)          |

---

|              |                         |                  |
|--------------|-------------------------|------------------|
| Shirabe,2021 | Quartile 2              | 0.85 (0.64-1.14) |
|              | Quartile 3              | 1.00 (0.76-1.33) |
|              | Quartile 4              | 0.99 (0.74-1.32) |
|              | Quartile 1 (Woman)      | 1 (ref)          |
|              | Quartile 2              | 0.99 (0.62-1.56) |
|              | Quartile 3              | 0.81 (0.47-1.31) |
|              | Quartile 4              | 0.93 (0.57-1.51) |
|              | Soymilk                 |                  |
|              | Non-consumer (Man)      | 1 (ref)          |
|              | Consumer                | 1.34 (0.96-1.88) |
|              | Non-consumer (Man)      | 1 (ref)          |
|              | Consumer                | 1.28 (0.76-2.16) |
|              | Total soy foods         |                  |
|              | 31.8 g/day              | 1 (ref)          |
|              | 56.4 g/day              | 1.06 (0.79-1.43) |
|              | 82.5 g/day              | 0.99 (0.73-1.34) |
|              | 137 g/day               | 1.07 (0.79-1.46) |
|              | Fermented soy foods     |                  |
|              | 7.3 g/day               | 1 (ref)          |
|              | 19.3 g/day              | 1.25 (0.93-1.69) |
|              | 32.6 g/day              | 1.02 (0.74-1.41) |
|              | 53.2 g/day              | 0.94 (0.67-1.32) |
|              | Miso                    |                  |
|              | 2.9 g/day               | 1 (ref)          |
|              | 9.8 g/day               | 0.98 (0.73-1.32) |
|              | 17.7 g/day              | 1.03 (0.76-1.40) |
|              | 29.1 g/day              | 0.88 (0.64-1.22) |
|              | Natto                   |                  |
|              | 0.01 g/day              | 1 (ref)          |
|              | 3.8 g/day               | 1.42 (1.03-1.97) |
|              | 11.9 g/day              | 1.26 (0.90-1.77) |
|              | 32.7 g/day              | 1.08 (0.76-1.54) |
|              | Non-fermented soy foods |                  |
|              | 13.5 g/day              | 1 (ref)          |
|              | 28.2 g/day              | 1.06 (0.79-1.44) |
|              | 47.7 g/day              | 1.18 (0.88-1.58) |
|              | 98.5 g/day              | 1.15 (0.85-1.57) |
|              | Tofu                    |                  |
|              | 10.3 g/day              | 1 (ref)          |
|              | 22.1 g/day              | 0.98 (0.73-1.33) |
|              | 37.3 g/day              | 1.23 (0.93-1.65) |
|              | 74.1 g/day              | 1.02 (0.75-1.38) |
|              | Soy milk                |                  |

|             | No                        | 1 (ref)          |
|-------------|---------------------------|------------------|
|             | Yes                       | 1.34 (0.97-1.86) |
| Nozue, 2021 | Total soy product         |                  |
|             | 33.6 g/day (Woman)        | 1 (ref)          |
|             | 58.7 g/day                | 0.91 (0.78-1.06) |
|             | 85.1 g/day                | 0.87 (0.75-1.02) |
|             | 140.9 g/day               | 0.92 (0.78-1.07) |
|             | 33.7 g/day (Man)          | 1 (ref)          |
|             | 59.6 g/day                | 0.90 (0.80-1.01) |
|             | 86.5 g/day                | 0.97 (0.86-1.09) |
|             | 130.9 g/day               | 1.05 (0.93-1.19) |
|             | Fermented soy products    |                  |
|             | 8.6g/day (Woman)          | 1 (ref)          |
|             | 21.4 g/day                | 0.91 (0.78-1.06) |
|             | 34.8 g/day                | 0.86 (0.73-1.01) |
|             | 55.1 g/day                | 0.80 (0.68-0.95) |
|             | 9.5 g/day (Man)           | 1 (ref)          |
|             | 23.8 g/day                | 0.97 (0.86-1.10) |
|             | 37.7 g/day                | 1.03 (0.91-1.17) |
|             | 60.0 g/day                | 1.04 (0.91-1.18) |
|             | Nonfermented soy products |                  |
|             | 13.5 g/day (Woman)        | 1 (ref)          |
|             | 28.6 g/day                | 0.87 (0.75-1.02) |
|             | 48.5 g/day                | 0.87 (0.64-1.02) |
|             | 99.5 g/day                | 0.94 (0.80-1.09) |
|             | 12.1 g/day (Man)          | 1 (ref)          |
|             | 26.4 g/day                | 0.91 (0.81-1.03) |
|             | 46.2 g/day                | 1.01 (0.90-1.13) |
|             | 97 g/day                  | 1.01 (0.89-1.14) |
|             | Miso                      |                  |
|             | 3.8 g/day (Woman)         | 1 (ref)          |
|             | 11.2 g/day                | 0.92 (0.79-1.07) |
|             | 19.9 g/day                | 0.83 (0.71-0.97) |
|             | 30.5 g/day                | 0.87 (0.74-1.02) |
|             | 5.1 g/day (Man)           | 1 (ref)          |
|             | 14.0 g/day                | 1.06 (0.94-1.19) |
|             | 23.8 g/day                | 1.06 (0.94-1.20) |
|             | 35.8 g/day                | 1.09 (0.96-1.23) |
|             | Natto                     |                  |
|             | 0 g/day (Woman)           | 1 (ref)          |
|             | 2.4 g/day                 | 0.95 (0.82-1.12) |
|             | 13.4 g/day                | 0.87 (0.74-1.03) |
|             | 32.4 g/day                | 0.84 (0.71-1.00) |
|             | 0.0 g/day                 | 1 (ref)          |

|                    |                                  |                  |
|--------------------|----------------------------------|------------------|
|                    | 3.2 g/day                        | 0.93 (0.83-1.05) |
|                    | 12.0 g/day                       | 0.91 (0.80-1.04) |
|                    | 32.1 g/day                       | 0.94 (0.82-1.08) |
| Shin, 2023         | Soybean paste                    |                  |
|                    | Almost never (Man)               | 1 (ref)          |
|                    | ≥ 2 times/week                   | 0.81 (0.56-1.16) |
|                    | Almost never (Woman)             | 1 (ref)          |
|                    | ≥ 2 times/week                   | 0.83 (0.6-1.5)   |
|                    | Tofu                             |                  |
|                    | Almost never (Man)               | 1 (ref)          |
|                    | ≥ 2 times/week                   | 0.63 (0.45-0.89) |
|                    | Almost never (Woman)             | 1 (ref)          |
|                    | ≥ 2 times/week                   | 0.93 (0.68-1.26) |
| Lee,1995           | Tofu                             |                  |
|                    | None or 4-5 times/year           | 1 (ref)          |
|                    | 1-3 times/week                   | 0.5 (0.1-1.5)    |
|                    | ≥2-3 times/week                  | 0.2 (0.1-0.8)    |
| Horn-Ross,<br>2001 | Tofu                             |                  |
|                    | Nonconsumers                     | 1 (ref)          |
|                    | <1 times/month                   | 0.79 (0.63-0.99) |
|                    | ≥1 times/month                   | 0.89 (0.70-1.1)  |
|                    | Soy milk                         |                  |
|                    | Nonconsumers                     | 1 (ref)          |
|                    | Consumers                        | 0.57 (0.38-0.85) |
|                    | Miso soup                        |                  |
|                    | Nonconsumers                     | 1 (ref)          |
|                    | <1 times/month                   | 1.1 (0.81-1.4)   |
|                    | ≥1 times/month                   | 1.1 (0.81-1.5)   |
| Seow,2002          | Soy foods                        |                  |
|                    | <2.2 servings/week (Smokers)     | 1 (ref)          |
|                    | 2.2-<5.4 servings/week           | 1.58 (0.81-3.09) |
|                    | ≥5.4 servings/week               | 1.53 (0.76-3.11) |
|                    | <2.2 servings/week (Non-smokers) | 1 (ref)          |
|                    | 2.2-<5.4 servings/week           | 0.57 (0.38-0.86) |
|                    | ≥5.4 servings/week               | 0.53 (0.34-0.81) |
| Wu,2002            | Tofu                             |                  |
|                    | Less than monthly                | 1 (ref)          |
|                    | 1-3 times/month                  | 0.73 (0.47-1.14) |
|                    | 1-3 times/week                   | 0.62 (0.42-0.92) |
|                    | >4 times/week                    | 0.65 (0.38-1.10) |
| Hirose,2003        | Soybean curd (Premenopausal)     |                  |
|                    | <1-3 times/month                 | 1 (ref)          |
|                    | 1-2 times/week                   | 0.98 (0.82-1.17) |
|                    | 3-4 times/week                   | 0.86 (0.71-1.04) |

|                              |                                  |                  |
|------------------------------|----------------------------------|------------------|
|                              | ≥5 times/week                    | 0.84 (0.67-1.04) |
|                              | Miso soup                        |                  |
|                              | Almost never                     | 1 (ref)          |
|                              | occasionally                     | 0.98 (0.72-1.35) |
|                              | 1 time/day                       | 1.08 (0.79-1.48) |
|                              | 2 times/day                      | 1.14 (0.79-1.65) |
|                              | Soybean curd (Postmenopausal)    |                  |
|                              | <1-3 times/month                 | 1 (ref)          |
|                              | 1-2 times/week                   | 0.89 (0.72-1.12) |
|                              | 3-4 times/week                   | 0.89 (0.70-1.11) |
|                              | ≥5 times/week                    | 0.83 (0.65-1.05) |
|                              | Miso soup                        |                  |
|                              | Almost never                     | 1 (ref)          |
|                              | occasionally                     | 1.01 (0.72-1.43) |
|                              | 1 time/day                       | 1.07 (0.76-1.50) |
|                              | 2 times/day                      | 0.89 (0.61-1.30) |
| Lee,2003                     | Soybean curd                     |                  |
|                              | <1 times/month(ref)              | 1 (ref)          |
|                              | ≥1 times/month                   | 0.3 (0.2-0.8)    |
| Jian,2004                    | Fermented soy products           |                  |
| [67]                         | 0 g/day                          | 1 (ref)          |
|                              | 0.1-4g/day                       | 0.77 (0.41-1.42) |
|                              | >4 g/day                         | 2.02 (1.08-3.78) |
| Hung,2004                    | Fermented bean product           |                  |
|                              | < 1 times/week (20-40 years old) | 1 (ref)          |
|                              | ≥1 times/week                    | 1.9 (1.1-3.2)    |
|                              | < 1 times/week (40+ years old)   | 1 (ref)          |
|                              | ≥1 times/week                    | 3.4 (1.9-6.2)    |
| Machida-<br>montani,<br>2004 | Miso soup                        |                  |
|                              | <3 cups/day                      | 1 (ref)          |
|                              | 3 cups/day                       | 1.8 (1.0-3.3)    |
|                              | ≥4 cups/day                      | 2.1 (0.9-5.1)    |
| Sonoda,2004                  | Tofu                             |                  |
|                              | ≤19.7 g/day                      | 1 (ref)          |
|                              | 19.7-42.7 g/day                  | 0.57 (0.27-1.20) |
|                              | 42.7-96.4 g/day                  | 0.81 (0.38-1.75) |
|                              | ≥ 96.4 g/day                     | 0.47 (0.20-1.08) |
|                              | All soy products                 |                  |
|                              | ≤7 g/day                         | 1 (ref)          |
|                              | 77-125 g/day                     | 0.75 (0.36-1.63) |
|                              | 125.1-187.2 g/day                | 0.66 (0.35-1.26) |
|                              | ≥187.2 g/day                     | 0.86 (0.37-2.01) |
|                              | Natto                            |                  |
|                              | ≤5.7 g/day                       | 1 (ref)          |



|             |                                  |                  |
|-------------|----------------------------------|------------------|
| Xu,2004     | 5.7-13.2 g/day                   | 1.10 (0.53-2.30) |
|             | 13.2-40 g/day                    | 0.66 (0.33-1.32) |
|             | ≥40 g/day                        | 0.25 (0.05-1.24) |
|             | Soy milk                         |                  |
|             | Never                            | 1 (ref)          |
|             | ≤1.9 g/day                       | 0.90 (0.70-1.17) |
|             | >1.9g/day                        | 0.86 (0.68-1.10) |
|             | Tofu                             |                  |
|             | ≤0.8 g/day                       | 1 (ref)          |
|             | 0.9-1.8 g/day                    | 1.10 (0.85-1.44) |
|             | 1.9-3.5 g/day                    | 0.90 (0.68-1.21) |
|             | >3.5 g/day                       | 0.80 (0.54-1.19) |
|             | Soya products (no tofu)          |                  |
|             | ≤1.8 g/day                       | 1 (ref)          |
| Nan,2005    | 1.9-5.3 g/day                    | 1.07 (0.81-1.43) |
|             | 5.4-8.8 g/day                    | 0.90 (0.68-1.18) |
|             | >8.8 g/day                       | 0.84 (0.59-1.21) |
|             | Soybean paste                    |                  |
| Hirose,2005 | Low                              | 1 (ref)          |
|             | High                             | 1.62 (1.26-2.09) |
|             | Soybean products                 |                  |
|             | 17.2 g/1000kcal (Premenopausal)  | 1 (ref)          |
|             | 29.7 g/1000kcal                  | 0.60 (0.30-1.18) |
|             | 47.9 g/1000kcal                  | 0.53 (0.27-1.04) |
|             | 20.1 g/1000kcal (Postmenopausal) | 1 (ref)          |
|             | 35.5 g/1000kcal                  | 0.87 (0.47-1.61) |
|             | 56.5 g/1000kcal                  | 0.70 (0.37-1.33) |
|             | Tofu                             |                  |
|             | 8.9 g/1000kcal (Premenopausal)   | 1 (ref)          |
|             | 17.1 g/1000kcal                  | 0.44 (0.22-0.90) |
|             | 31.3 g/1000kcal                  | 0.49 (0.25-0.95) |
|             | 10.8 g/1000kcal (Postmenopausal) | 1 (ref)          |
|             | 19.6 g/1000kcal                  | 1.34 (0.73-2.44) |
|             | 35.9 g/1000kcal                  | 0.71 (0.36-1.39) |
|             | Miso                             |                  |
|             | 1.4 g/1000kcal (Premenopausal)   | 1 (ref)          |
|             | 3.4 g/1000kcal                   | 1.14 (0.59-2.19) |
|             | 5.5 g/1000kcal                   | 0.58 (0.28-1.20) |
|             | 1.5 g/1000kcal (Postmenopausal)  | 1 (ref)          |
|             | 3.9 g/1000kcal                   | 0.52 (0.27-0.98) |
|             | 5.8 g/1000kcal                   | 0.64 (0.34-1.17) |
|             | Natto                            |                  |
|             | 1.2 g/1000kcal (Premenopausal)   | 1 (ref)          |
|             | 3.7 g/1000kcal                   | 0.89 (0.46-1.74) |

|              |                                    |                  |
|--------------|------------------------------------|------------------|
|              | 8.7 g/1000kcal                     | 0.84 (0.43-1.64) |
|              | 1.3 g/1000kcal (Postmenopausal)    | 1 (ref)          |
|              | 4.0 g/1000kcal                     | 1.00 (0.54-1.87) |
|              | 10.8 g/1000kcal                    | 0.79 (0.41-1.51) |
| Sharp,2005   | Miso soup                          |                  |
|              | Never or $\leq 1$ /week            | 1 (ref)          |
|              | 2-4 times/week                     | 0.6 (0.16-2.27)  |
|              | $\geq 5$ times/week                | 0.5 (0.14-1.55)  |
|              | Tofu                               |                  |
|              | Never or $\leq 1$ /week            | 1 (ref)          |
|              | 2-4 times/week                     | 0.9 (0.31-2.66)  |
|              | $\geq 5$ times/week                | 0.9 (0.20-3.51)  |
| Shannon,2005 | Total soy food                     |                  |
| 5            | $\leq 2.6$ servings/week           | 1 (ref)          |
|              | <4.4 servings/week                 | 0.96 (0.60-1.53) |
|              | <1.1 servings/day                  | 1.33 (0.84-2.12) |
|              | $\geq 1.1$ servings/day            | 1.07 (0.68-1.69) |
|              | Unfermented soy food               |                  |
|              | $\leq 2.3$ servings/week           | 1 (ref)          |
|              | <4.2 servings/week                 | 1.04 (0.66-1.66) |
|              | <1 servings/d                      | 1.23 (0.77-1.95) |
|              | $\geq 1$ servings/day              | 1.22 (0.78-1.92) |
| Heald,2007   | soy food consumption               |                  |
|              | No (ref)                           | 1 (ref)          |
|              | Yes                                | 0.52 (0.30-0.91) |
| Kim,2008     | Tofu                               |                  |
|              | <7.73 g/day                        | 1 (ref)          |
|              | 7.74-14.39 g/day                   | 0.68 (0.39-1.18) |
|              | 14.4-23.59 g/day                   | 0.54 (0.31-0.93) |
|              | 23.6-49.49 g/day                   | 0.46 (0.27-0.79) |
|              | $\geq 49.5$ g/day                  | 0.31 (0.17-0.57) |
| Li,2008      | Soybean food<br>(Tofu and Soymilk) |                  |
|              | $\leq 2$ times/week                | 1 (ref)          |
|              | 3-6 times/week                     | 0.38 (0.13-1.12) |
|              | $\geq 1$ times/day                 | 0.29 (0.11-0.79) |
| Matsuo,2008  | Soybean products                   |                  |
|              | 19.8 g/day (EGFR <sup>mut</sup> )  | 1 (ref)          |
|              | 44.1 g/day                         | 0.79 (0.50-1.27) |
|              | 81.8 g/day                         | 0.56 (0.34-0.93) |
|              | 19.8 g/day (EGFR <sup>wt</sup> )   | 1 (ref)          |
|              | 44.1 g/day                         | 1.19 (0.85-1.68) |
|              | 81.8 g/day                         | 0.89 (0.61-1.29) |
|              | Miso soup                          |                  |

|                                          |                  |
|------------------------------------------|------------------|
| ≤3-4 times/week (EGFR <sup>mut</sup> )   | 1 (ref)          |
| ≤ once a day                             | 0.69 (0.46-1.03) |
| twice a day                              | 0.23 (0.07-0.77) |
| ≤3-4 times/week (EGFR <sup>wt</sup> )    | 1 (ref)          |
| ≤ once a day                             | 1.08 (0.79-1.48) |
| twice a day                              | 1.17 (0.70-1.96) |
| Tofu                                     |                  |
| ≤1-3 times/month (EGFR <sup>mut</sup> )  | 1 (ref)          |
| 1-2 /week                                | 1.07 (0.66-1.74) |
| ≥3-4 times/week                          | 0.80 (0.48-1.36) |
| ≤1-3 times/month (EGFR <sup>wt</sup> )   | 1 (ref)          |
| 1-2 /week                                | 1.30 (0.92-1.84) |
| ≥3-4 times/week                          | 1.14 (0.78-1.66) |
| Natto                                    |                  |
| ≤1-3 times/month (EGFR <sup>mut</sup> )  | 1 (ref)          |
| ≥3-4 times/week                          | 0.63 (0.40-0.99) |
| ≥once a day                              | 0.59 (0.33-1.06) |
| ≤1-3 times/month (EGFR <sup>wt</sup> )   | 1 (ref)          |
| ≥3-4 times/week                          | 0.85 (0.61-1.16) |
| ≥once a day                              | 0.91 (0.58-1.43) |
| Miso soup (Total)                        |                  |
| ≤ 3-4 times/week (EGFR <sup>mut</sup> )  | 1 (ref)          |
| ≤ once a day                             | 0.69 (0.46-1.03) |
| Twice a day                              | 0.23 (0.07-0.77) |
| ≤ 3-4 times/week (EGFR <sup>wt</sup> )   | 1 (ref)          |
| ≤ once a day                             | 1.08 (0.79-1.48) |
| Twice a day                              | 1.17 (0.70-1.96) |
| Miso soup (Male)                         |                  |
| ≤ 3-4 times/week (EGFR <sup>mut</sup> )  | 1 (ref)          |
| ≤ once a day                             | 0.46 (0.24-0.91) |
| Twice a day                              | 0.12 (0.02-0.92) |
| ≤ 3-4 times/week (EGFR <sup>wt</sup> )   | 1 (ref)          |
| ≤ once a day                             | 1.12 (0.78-1.61) |
| Twice a day                              | 0.90 (0.49-1.68) |
| Miso soup (Female)                       |                  |
| ≤ 3-4 times/week (EGFR <sup>mut</sup> )  | 1 (ref)          |
| ≤ once a day                             | 0.87 (0.52-1.45) |
| Twice a day                              | 0.35 (0.08-1.57) |
| ≤ 3-4 times/week (EGFR <sup>wt</sup> )   | 1 (ref)          |
| ≤ once a day                             | 1.00 (0.54-1.82) |
| Twice a day                              | 2.33 (0.89-6.15) |
| Natto (Total)                            |                  |
| ≤ 1-3 times/month (EGFR <sup>mut</sup> ) | 1 (ref)          |
| ≥ 3-4 times/week                         | 0.63 (0.40-0.99) |

|              |                                          |                  |
|--------------|------------------------------------------|------------------|
| Bandera,2009 | ≥ once a day                             | 0.59 (0.33-1.06) |
|              | ≤ 1-3 times/month (EGFR <sup>wt</sup> )  | 1 (ref)          |
|              | ≥ 3-4 times/week                         | 0.85 (0.61-1.16) |
|              | ≥ once a day                             | 0.91 (0.58-1.43) |
|              | Natto (Male)                             |                  |
|              | ≤ 1-3 times/month (EGFR <sup>mut</sup> ) | 1 (ref)          |
|              | ≥ 3-4 times/week                         | 0.57 (0.28-1.17) |
|              | ≥ once a day                             | 0.56 (0.22-1.43) |
|              | ≤ 1-3 times/month (EGFR <sup>wt</sup> )  | 1 (ref)          |
|              | ≥ 3-4 times/week                         | 0.89 (0.61-1.29) |
|              | ≥ once a day                             | 0.84 (0.48-1.47) |
|              | Natto (Female)                           |                  |
|              | ≤ 1-3 times/month (EGFR <sup>mut</sup> ) | 1 (ref)          |
|              | ≥ 3-4 times/week                         | 0.69 (0.38-1.22) |
|              | ≥ once a day                             | 0.62 (0.29-1.34) |
|              | ≤ 1-3 times/month (EGFR <sup>wt</sup> )  | 1 (ref)          |
|              | ≥ 3-4 times/week                         | 0.71 (0.38-1.35) |
|              | ≥ once a day                             | 1.01 (0.45-2.29) |
|              | Tofu (Total)                             |                  |
|              | ≤ 1-3 times/month (EGFR <sup>mut</sup> ) | 1 (ref)          |
|              | 1-2 times/week                           | 1.07 (0.66-1.74) |
|              | ≥ 3-4 times/week                         | 0.80 (0.48-1.36) |
|              | ≤ 1-3 times/month (EGFR <sup>wt</sup> )  | 1 (ref)          |
|              | 1-2 times/week                           | 1.30 (0.92-1.84) |
|              | ≥ 3-4 times/week                         | 1.14 (0.78-1.66) |
|              | Tofu (Male)                              |                  |
|              | ≤ 1-3 times/month (EGFR <sup>mut</sup> ) | 1 (ref)          |
|              | 1-2 times/week                           | 0.54 (0.25-1.15) |
|              | ≥ 3-4 times/week                         | 0.61 (0.27-1.39) |
|              | ≤ 1-3 times/month (EGFR <sup>wt</sup> )  | 1 (ref)          |
|              | 1-2 times/week                           | 1.33 (0.90-1.97) |
|              | ≥ 3-4 times/week                         | 0.97 (0.61-1.53) |
|              | Tofu (Female)                            |                  |
|              | ≤ 1-3 times/month (EGFR <sup>mut</sup> ) | 1 (ref)          |
|              | 1-2 times/week                           | 1.85 (0.93-3.69) |
|              | ≥ 3-4 times/week                         | 1.15 (0.55-2.38) |
|              | ≤ 1-3 times/month (EGFR <sup>wt</sup> )  | 1 (ref)          |
|              | 1-2 times/week                           | 1.06 (0.51-2.23) |
|              | ≥ 3-4 times/week                         | 1.46 (0.73-2.94) |
| Bandera,2009 | Tofu                                     |                  |
|              | Never                                    | 1 (ref)          |
|              | Ever                                     | 0.68 (0.45-1.03) |
|              | Soy milk                                 |                  |
|              | Never                                    | 1 (ref)          |

|                    |                                     |                  |
|--------------------|-------------------------------------|------------------|
| Liu,2009           | Ever                                | 0.85 (0.55-1.33) |
|                    | Miso                                |                  |
|                    | Never                               | 1 (ref)          |
|                    | Ever                                | 1.31 (0.83-2.07) |
|                    | Bean-curd food                      |                  |
|                    | Rare or occasional (2-5 years old)  | 1 (ref)          |
|                    | Frequent                            | 0.47 (0.22-0.99) |
|                    | Rare or occasional (2-20 years old) | 1 (ref)          |
|                    | Frequent                            | 0.55 (0.34-0.89) |
|                    | Tofu                                |                  |
| Hosono,2010        | None (invasive carcinoma)           | 1 (ref)          |
|                    | <1 times/week                       | 0.80 (0.49-1.32) |
|                    | 1-4 times/week                      | 0.78 (0.48-1.26) |
|                    | >5 times/week                       | 0.64 (0.33-1.25) |
|                    | None (CIN3)                         | 1 (ref)          |
|                    | <1 times/week                       | 1.45 (0.49-4.30) |
|                    | 1-4 times/week                      | 0.76 (0.26-2.23) |
|                    | >5 times/week                       | 0.55 (0.13-2.36) |
|                    | Soy foods (Total)                   |                  |
|                    | 5.4 g/day                           | 1 (ref)          |
| Budhathoki<br>2011 | 8.8 g/day                           | 0.89 (0.65-1.22) |
|                    | 13.1 g/day                          | 0.82 (0.59-1.13) |
|                    | 18.5 g/day                          | 0.66 (0.47-0.94) |
|                    | 26.8 g/day                          | 0.73 (0.51-1.04) |
|                    | Soy foods (Men)                     |                  |
|                    | 5.4 g/day                           | 1 (ref)          |
|                    | 8.8 g/day                           | 0.80 (0.55-1.17) |
|                    | 13.1 g/day                          | 0.80 (0.53-1.19) |
|                    | 18.5 g/day                          | 0.55 (0.34-0.88) |
|                    | 26.8 g/day                          | 0.65 (0.41-1.03) |
| Chihara,2012       | Soy foods (Women)                   |                  |
|                    | 5.4 g/day                           | 1 (ref)          |
|                    | 8.8 g/day                           | 1.11 (0.61-2.04) |
|                    | 13.1 g/day                          | 0.89 (0.50-1.60) |
|                    | 18.5 g/day                          | 0.90 (0.51-1.61) |
|                    | 26.8 g/day                          | 0.92 (0.50-1.67) |
|                    | Miso soup                           |                  |
|                    | <1 time/week (Man)                  | 1 (ref)          |
|                    | 1-6 times/week                      | 1.21 (0.58-2.55) |
|                    | ≥1 time/day                         | 1.34 (0.63-2.83) |
|                    | <1 time/week (Woman)                | 1 (ref)          |
|                    | 1-6 times/week                      | 0.93 (0.49-1.79) |
|                    | ≥1 time/day                         | 0.75 (0.37-1.53) |
|                    | Tofu                                |                  |
|                    |                                     |                  |

|                    |                      |                  |
|--------------------|----------------------|------------------|
| Wang,2012          | <1 time/week (Man)   | 1 (ref)          |
|                    | 1-6 times/week       | 1.13 (0.77-1.66) |
|                    | ≥1 time/day          | 1.60 (0.70-3.67) |
|                    | <1 time/week (Woman) | 1 (ref)          |
|                    | 1-6 times/week       | 0.98 (0.65-1.47) |
|                    | ≥1 time/day          | 1.09 (0.47-2.55) |
|                    | Natto                |                  |
|                    | <1 time/week (Man)   | 1 (ref)          |
|                    | 1-6 times/week       | 1.01 (0.68-1.50) |
|                    | ≥1 time/day          | 0.83 (0.41-1.69) |
|                    | <1 time/week (Woman) | 1 (ref)          |
|                    | 1-6 times/week       | 0.59 (0.39-0.88) |
|                    | ≥1 time/day          | 0.68 (0.35-1.31) |
|                    | Soy food             |                  |
| Wang,2012          | Never                | 1 (ref)          |
|                    | 1-3 times/month      | 0.30 (0.03-2.99) |
|                    | 1-2 times/week       | 0.17 (0.02-1.63) |
|                    | ≥3 times/week        | 0.10 (0.01-0.94) |
|                    | Soya products        |                  |
| Zaineddin,<br>2012 | Tertile 1            | 1 (ref)          |
|                    | Tertile 2            | 0.2 (0.07-2.3)   |
|                    | Tertile 3            | 0.04 (0.01-0.3)  |
|                    | Soy milk             |                  |
|                    | No consumption       | 1 (ref)          |
| Lee,2014           | Low consumption      | 0.95 (0.73-1.25) |
|                    | High consumption     | 0.94 (0.75-1.18) |
|                    | Tofu                 |                  |
|                    | No consumption       | 1 (ref)          |
|                    | Low consumption      | 0.99 (0.76-1.28) |
|                    | High consumption     | 0.89 (0.73-1.07) |
|                    | Paste                |                  |
|                    | No consumption       | 1 (ref)          |
|                    | Low consumption      | 0.91 (0.71-1.16) |
|                    | High consumption     | 0.79 (0.62-1.03) |
|                    | Total soy foods      |                  |
|                    | ≤61.4 g/day          | 1 (ref)          |
|                    | 61.5-119 g/day       | 0.63 (0.46-0.86) |
|                    | >119 g/day           | 0.29 (0.20-0.42) |
|                    | Soy milk             |                  |
|                    | ≤12.9 ml/day         | 1 (ref)          |
|                    | 13-38.6 ml/day       | 0.66 (0.47-0.91) |
|                    | >38.6 ml/day         | 0.43 (0.31-0.60) |
|                    | Tofu                 |                  |
|                    | ≤8.6 g/day           | 1 (ref)          |

|           |                      |                  |
|-----------|----------------------|------------------|
| Tang,2015 | 8.7-20 g/day         | 1.00 (0.73-1.36) |
|           | >20 g/day            | 0.57 (0.40-0.80) |
|           | Total soya foods     |                  |
|           | <26 g/day            | 1 (ref)          |
|           | 26-97 g/day          | 0.53 (0.37-0.76) |
|           | >97 g/day            | 0.33 (0.22-0.49) |
|           | Soya milk            |                  |
|           | <2 ml/day            | 1 (ref)          |
|           | 2-60 ml/day          | 0.58 (0.40-0.86) |
|           | >60 ml/day           | 0.48 (0.31-0.73) |
| Shin,2015 | Soy products         |                  |
|           | <40.34 g/day (Man)   | 1 (ref)          |
|           | 40.34-<64.64 g/day   | 1.38 (1.05-1.80) |
|           | 64.64-105.03 g/day   | 1.40 (1.07-1.83) |
|           | ≥105.03 g/day        | 0.67 (0.49-0.92) |
|           | <42.77 g/day (Woman) | 1 (ref)          |
|           | 42.77-<70.29 g/day   | 1.27 (0.86-1.88) |
|           | 70.29-113.66 g/day   | 1.37 (0.92-2.04) |
|           | ≥113.66 g/day        | 0.62 (0.39-1.00) |
|           | Tofu                 |                  |
|           | <17.19 g/day (Man)   | 1 (ref)          |
|           | 17.19-<30.77 g/day   | 1.82 (1.37-2.42) |
|           | 30.77-52.86 g/day    | 2.03 (1.54-2.69) |
|           | ≥52.86 g/day         | 0.94 (0.68-1.29) |
|           | <18.73 g/day (Woman) | 1 (ref)          |
|           | 18.73-32.68 g/day    | 1.80 (1.19-2.72) |
|           | 32.68-<54.91 g/day   | 1.80 (1.20-2.72) |
|           | ≥54.91 g/day         | 0.97 (0.61-1.52) |
|           | Soymilk              |                  |
|           | 0 g/day (Man)        | 1 (ref)          |
|           | 0-<21.35 g/day       | 1.74 (1.39-2.17) |
|           | ≥21.35g/day          | 0.47 (0.34-0.64) |
|           | 0 g/day (Woman)      | 1 (ref)          |
|           | 0-<19.1 g/day        | 1.50 (1.04-2.15) |
|           | ≥19.1g/day           | 0.82 (0.54-1.25) |
|           | Fermented soy paste  |                  |
|           | <1.95 g/day (Woman)  | 1 (ref)          |
|           | 1.95-<4.04 g/day     | 1.81 (1.33-2.45) |
|           | 4.04-<8.32 g/day     | 2.06 (1.53-2.78) |
|           | ≥8.32 g/day          | 1.82 (1.35-2.46) |
|           | <2.08 g/day (Woman)  | 1 (ref)          |
|           | 2.08-<4.5 g/day      | 1.62 (1.06-2.49) |
|           | 4.5-<8.7 g/day       | 1.57 (1.02-2.41) |
|           | ≥8.7 g/day           | 1.22 (0.77-1.91) |

|           |                                 |                  |
|-----------|---------------------------------|------------------|
| Yang,2017 | Total soy products (Total)      |                  |
|           | ≤48.39 g/day                    | 1 (ref)          |
|           | 48.39-86.2 g/day                | 1.23 (0.88-1.72) |
|           | >86.2 g/day                     | 0.85 (0.59-1.20) |
|           | Total soy products (Male)       |                  |
|           | ≤48.39 g/day                    | 1 (ref)          |
|           | 48.39-86.2 g/day                | 1.34 (0.89-2.02) |
|           | >86.2 g/day                     | 0.69 (0.43-1.09) |
|           | Total soy products (Female)     |                  |
|           | ≤48.39 g/day                    | 1 (ref)          |
|           | 48.39-86.2 g/day                | 0.98 (0.54-1.79) |
|           | >86.2 g/day                     | 1.07 (0.61-1.89) |
|           | Fermented soy foods (Total)     |                  |
|           | ≤2.29 g/day                     | 1 (ref)          |
|           | 2.29-5.78 g/day                 | 0.97 (0.68-1.37) |
|           | >5.78 g/day                     | 1.08 (0.77-1.51) |
|           | Fermented soy foods (Male)      |                  |
|           | ≤2.29 g/day                     | 1 (ref)          |
|           | 2.29-5.78 g/day                 | 0.93 (0.60-1.43) |
|           | >5.78 g/day                     | 0.90 (0.59-1.38) |
|           | Fermented soy foods (Female)    |                  |
|           | ≤2.29 g/day                     | 1 (ref)          |
|           | 2.29-5.78 g/day                 | 1.06 (0.58-1.94) |
|           | >5.78 g/day                     | 1.46 (0.89-2.63) |
|           | Nonfermented soy foods (Total)  |                  |
|           | ≤42.95 g/day                    | 1 (ref)          |
|           | 42.95-85.54 g/day               | 1.13 (0.81-1.56) |
|           | >85.54 g/day                    | 0.62 (0.43-0.90) |
|           | Nonfermented soy foods (Male)   |                  |
|           | ≤42.95 g/day                    | 1 (ref)          |
|           | 42.95-85.54 g/day               | 1.14 (0.76-1.71) |
|           | >85.54 g/day                    | 0.44 (0.27-0.71) |
|           | Nonfermented soy foods (Female) |                  |
|           | ≤42.95 g/day                    | 1 (ref)          |
|           | 42.95-85.54 g/day               | 1.07 (0.60-1.92) |
|           | >85.54 g/day                    | 0.97 (0.54-1.77) |
|           | Tofu (Total)                    |                  |
|           | ≤20.47 g/day                    | 1 (ref)          |
|           | 20.47-40.05 g/day               | 0.79 (0.56-1.12) |
|           | >40.05 g/day                    | 0.91 (0.65-1.28) |
|           | Tofu (Male)                     |                  |
|           | ≤20.47 g/day                    | 1 (ref)          |
|           | 20.47-40.05 g/day               | 0.86 (0.56-1.31) |
|           | >40.05 g/day                    | 0.79 (0.52-1.21) |



|              |                                 |                  |
|--------------|---------------------------------|------------------|
| Barrett,2019 | Tofu (Female)                   |                  |
|              | ≤20.47 g/day                    | 1 (ref)          |
|              | 20.47-40.05 g/day               | 0.66 (0.63-1.21) |
|              | >40.05 g/day                    | 1.12 (0.53-1.99) |
|              | Soymilk (Total)                 |                  |
|              | ≤4.24E <sup>-9</sup> g/day      | 1 (ref)          |
|              | 4.24E <sup>-9</sup> -3.55 g/day | 0.69 (0.49-0.96) |
|              | ≥3.55 g/day                     | 0.61 (0.43-0.87) |
|              | Soymilk (Male)                  |                  |
|              | ≤4.24E <sup>-9</sup> g/day      | 1 (ref)          |
|              | 4.24E <sup>-9</sup> -3.55 g/day | 0.74 (0.49-1.12) |
|              | ≥3.55 g/day                     | 0.60 (0.39-0.92) |
|              | Soymilk (Female)                |                  |
|              | ≤4.24E <sup>-9</sup> g/day      | 1 (ref)          |
|              | 4.24E <sup>-9</sup> -3.55 g/day | 0.60 (0.34-1.08) |
|              | ≥3.55 g/day                     | 0.63 (0.35-1.13) |
|              | Bean paste (Adult)              |                  |
|              | 0 g/day (Men)                   | 1 (ref)          |
|              | >0-<0.61 g/day                  | 0.69 (0.58-0.82) |
|              | 0.61-<1.66 g/day                | 0.72 (0.60-0.85) |
|              | ≥1.66 g/day                     | 0.67 (0.56-0.80) |
|              | 0 g/day (Woman)                 | 1 (ref)          |
|              | >0-≤0.54 g/day                  | 0.69 (0.58-0.82) |
|              | >0.54-<1.66 g/day               | 0.72 (0.60-0.85) |
|              | ≥1.66 g/day                     | 0.67 (0.56-0.80) |
| Cao,2022     | Bean paste (Adolescent)         |                  |
|              | 0 g/day                         | 1 (ref)          |
|              | >0-<0.66 g/day                  | 0.83 (0.70-0.99) |
|              | 0.66-2.5 g/day                  | 0.75 (0.63-0.90) |
|              | >2.5 g/day                      | 0.78 (0.65-0.94) |
|              | Soy foods                       |                  |
|              | 0-3.3 g/day                     | 1 (ref)          |
|              | 3.4-28.6 g/day                  | 0.68 (0.51-0.91) |
| Teng,2023    | 28.6-57.1 g/day                 | 0.65 (0.50-0.86) |
|              | ≥57.1 g/day                     | 0.52 (0.39-0.69) |
|              | Soybean products (Total)        |                  |
|              | 0-10 g/day                      | 1 (ref)          |
|              | 10.1-21.7 g/day                 | 0.69 (0.35-1.36) |
|              | 21.8-41.7 g/day                 | 0.60 (0.33-1.08) |
|              | 41.8-181.7 g/day                | 0.75 (0.40-1.41) |
|              | Soybean products (Male)         |                  |
|              | 0-10 g/day                      | 1 (ref)          |
|              | 10.1-23.3 g/day                 | 1.18 (0.51-2.73) |
|              | 23.4-41.7 g/day                 | 0.95 (0.46-1.96) |

|           |                           |                  |
|-----------|---------------------------|------------------|
|           | 41.8-180 g/day            | 1.23 (0.55-2.71) |
|           | Soybean products (Female) |                  |
|           | 0-10 g/day                | 1 (ref)          |
|           | 10.1-20 g/day             | 0.31 (0.09-1.06) |
|           | 20.1-41.7 g/day           | 0.25 (0.08-0.78) |
|           | 41.8-181.7 g/day          | 0.33 (0.11-1.01) |
| Kwak,2023 | Soy products              |                  |
|           | Tertile 1                 | 1 (ref)          |
|           | Tertile 2                 | 0.38 (0.15-0.92) |
|           | Tertile3                  | 0.37 (0.14-0.96) |

<sup>1</sup> ref, reference; CI, confidence interval
